# Supplementary material for: The postcranial anatomy of Gorgonops torvus (Synapsida, Gorgonopsia) from the late Permian of South Africa
Source: PeerJ. 2023 Jul 7;11:e15378. doi: 10.7717/peerj.15378 (PMC10332358; doi:10.7717/peerj.15378)
Supplement: Supplemental Information 1 — Postcranial characters in gorgonopsians referred to in the main text [file peerj-11-15378-s001.xlsx]

## Sheet: Sheet1
Postcranial characters
	"African" taxa												"Russian" taxa
	SAM-PK-K10591, Gorgonops torvus	BSPG 1934 VIII 28, 522-540, Gorgonops sp. ("Scymnognathus cf. whaitsi")	SAM-PK-9344, "Aelurognathus" microdon	SAM-PK-2342, Aelurognathus tigriceps	NHCC LB350, Aelurognathus tigriceps	SAM-PK-9345, Arctognathus curvimola	SAM-PK-K10539, Cyonosaurus sp.	USNM 412381, Cyonosaurus sp.	BP/1/1210, Dinogorgon sp.?	BP/1/2167, Dinogorgon rubidgei	AMNH FARB 2240, Lycaenops ornatus	GPIT-PV-31579, "Scymnognathus" parringtoni	PIN 2005/1758, Inostrancevia alexandri	PIN 2351/32, Inostrancevia latifrons	PIN 156/5, Saurcotonus progressus	PIN 4548/1, Suchogorgon golubevi	PIN 2212/61, Viatkogorgon ivakhnenkoi
pectoral girdle
clavicle	thick, short	N/A	long, slender	thick, short	N/A	N/A	N/A	N/A	N/A	N/A	thick, short	long, slender	long, slender	N/A	long, slender	N/A	N/A
scapula	dorsal-most border more than double as wide as middle portion	N/A	dorsal-most border almost double as wide as middle portion	dorsal-most border almost double as wide as middle portion	N/A	dorsal-most border almost double as wide as middle portion	N/A	N/A	N/A	N/A	dorsal-most border almost double as wide as middle portion	dorsal-most border more than double as wide as middle portion	dorsal-most border more than three times as wide as middle portion	dorsal-most border more than three times as wide as middle portion	dorsal-most border almost double as wide as middle portion	dorsal-most border almost double as wide as middle portion	dorsal-most border almost double as wide as middle portion
forelimb
ratio of ulnar head maximum width vs. ulna length	ulna at least 3 times as long as ulnar head maximum width	ulna at least 3 times as long as ulnar head maximum width	ulna at least 3 times as long as ulnar head maximum width	N/A	N/A	ulna at least 3 times as long as ulnar head maximum width	N/A	ulna at least 3 times as long as ulnar head maximum width	N/A	N/A	ulna at least 3 times as long as ulnar head maximum width	ulna at least 3 times as long as ulnar head maximum width	ulna ca. 1.5 times as long as ulnar head maximum width	N/A	N/A	N/A	N/A
ratio of radial head maximum width vs. radius length	radius ca. 3.5-4 times as long as radial head maximum width	radius ca. 3.5-4 times as long as radial head maximum width	radius ca. 3.5-4 times as long as radial head maximum width	N/A	N/A	radius ca. 3.5-4 times as long as radial head maximum width	N/A	radius ca. 3.5-4 times as long as radial head maximum width	N/A	N/A	radius ca. 3.5-4 times as long as radial head maximum width	radius ca. 3.5-4 times as long as radial head maximum width	radius ca. 3 times as long as radial head maximum width			N/A
manus
radiale	triangular	N/A	N/A	rectangular/irregular	N/A	N/A	N/A	N/A	rectangular/irregular	N/A	round	rectangular	N/A	N/A	N/A	N/A	N/A
terminal manual phalanx of third finger	shorter than ulnare		N/A	same length or longer than ulnare	N/A	N/A	N/A	N/A	same length or longer than ulnare	N/A	N/A	same length or longer than ulnare	N/A	N/A	N/A	N/A	N/A
pelvic girdle
angle of posterior constriction between ilium and ischium	ca. 115°	N/A	< 90°	N/A	N/A	N/A	N/A	N/A	N/A	N/A	ca. 115°	ca. 90°	< 45°	N/A	N/A	N/A	N/A
hindlimb
femur	slender, slim shaft	slender, slim shaft	slender, slim shaft	N/A	N/A	N/A	slender, slim shaft	slender, slim shaft	N/A	N/A	slender, slim shaft	stocky, generally wider femoral head and shaft in relation to femur length	stocky, generally wider femoral head and shaft in relation to femur length	N/A	stocky, generally wider femoral head and shaft in relation to femur length	stocky, generally wider femoral head and shaft in relation to femur length	N/A
tibia	tibia length ca. 3 times as long as tibia head maximum width	tibia length ca. 3 times as long as tibia head maximum width	tibia length ca. 5 times as long as tibia head maximum width	N/A	N/A	N/A	N/A	N/A	N/A	N/A	tibia length ca. 3 times as long as tibia head maximum width	tibia length ca. 3 times as long as tibia head maximum width	tibia length < 2.5 times as long as tibia head maximum width	N/A	N/A	N/A	tibia length ca. 3 times as long as tibia head maximum width
fibula	fibula length ca. 5-6 times as wide as fibula head maximum width	fibula length ca. 5-6 times as wide as fibula head maximum width	fibula length ca. 5-6 times as wide as fibula head maximum width	N/A	N/A	N/A	N/A	N/A	N/A	N/A	fibula length ca. 5-6 times as wide as fibula head maximum width	fibula length ca. 4 times as wide as fibula head maximum width	N/A	N/A	N/A	N/A	fibula length ca. 5-6 times as wide as fibula head maximum width
pes					N/A
astragalus	rectangular	rectangular	N/A	N/A	irregular (constricted in medial midline)	N/A	N/A	N/A	N/A	N/A	irregular	N/A	N/A	N/A	N/A	N/A	N/A
largest cuneiform	third	third	N/A	N/A	first	N/A	N/A	N/A	N/A	third	third	N/A	N/A	N/A	N/A	N/A	N/A
pedal phalangeal formula	2-3-4-5-3	N/A	N/A	N/A	2-3-4-5-4	N/A	N/A	N/A	N/A	N/A	N/A	N/A	N/A	N/A	N/A	N/A	N/A
